# Supplementary material
Source: Springer Nature journal article supplement (https://www.springermedizin.de/resource/supplementary/13031_2009_37_MOESM2_ESM.pdf/9644984)

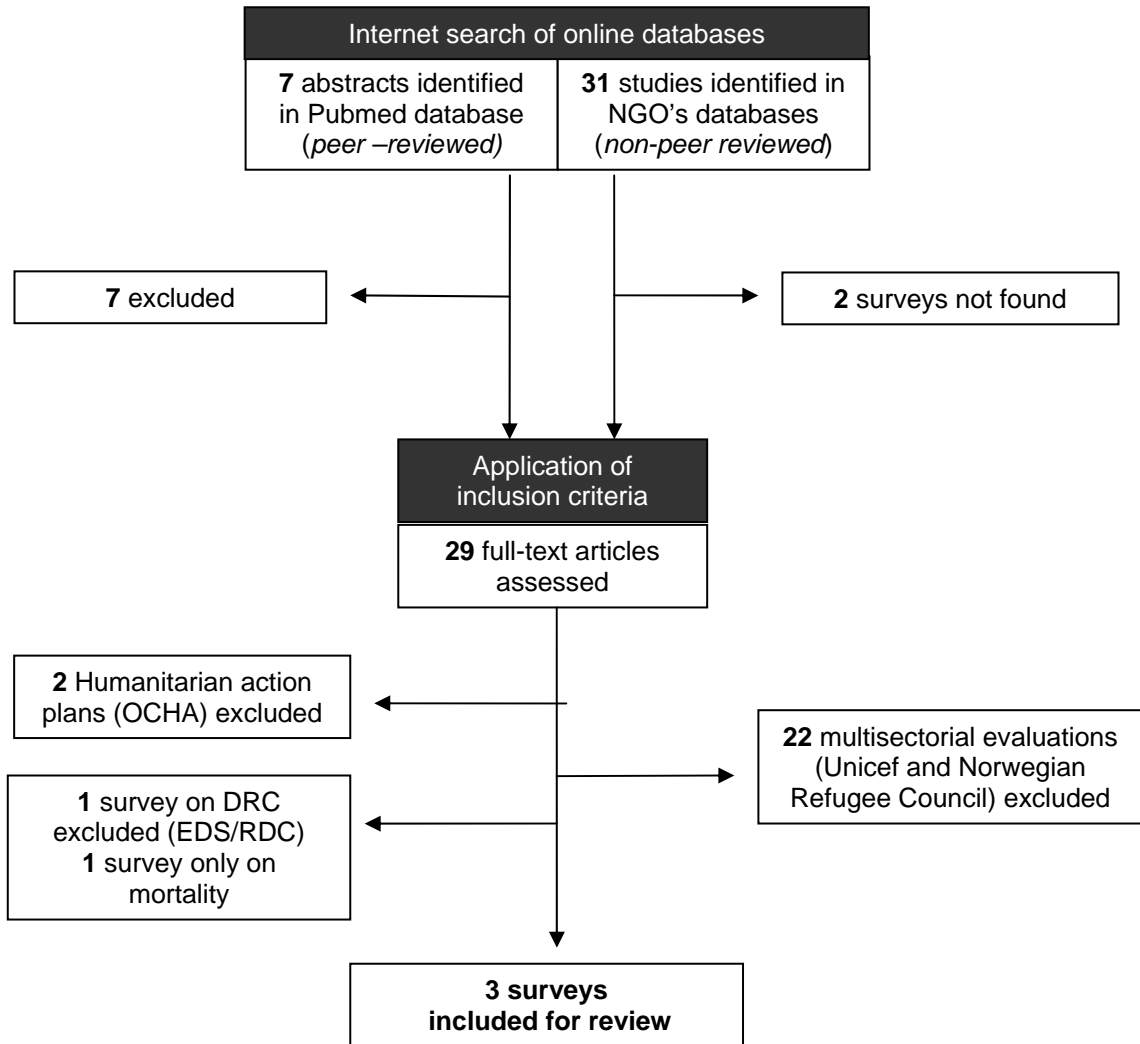

Supplement: MOESM2 [file 9644984]
